# Supplementary material
Source: PubMed Central journal article supplement (PMC3381908)
Supplement: NIHMS313103-supplement-1.pdf [file NIHMS313103-supplement-1.pdf]

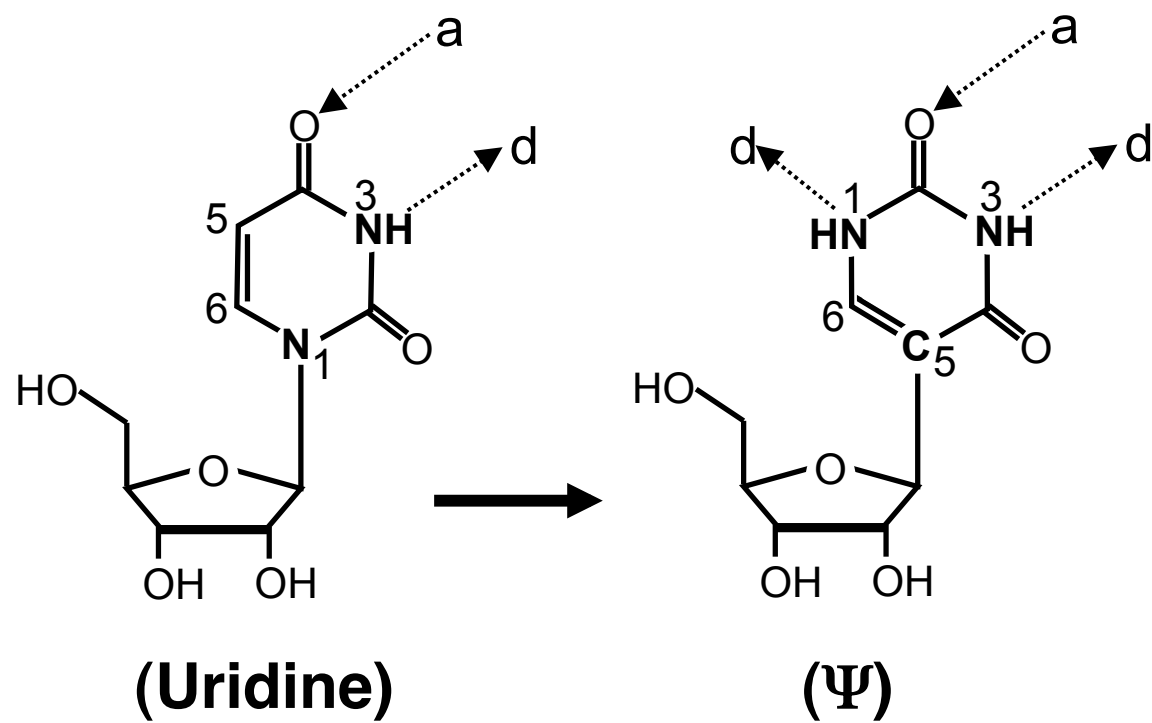

Sup. Fig. 1. Comparison of the structures of uridine and pseudouridine (Ψ). Ψ has one more hydrogen bond donor (d) than uridine, while hydrogen bond acceptors (a) are the same.

## Box H/ACA RNP

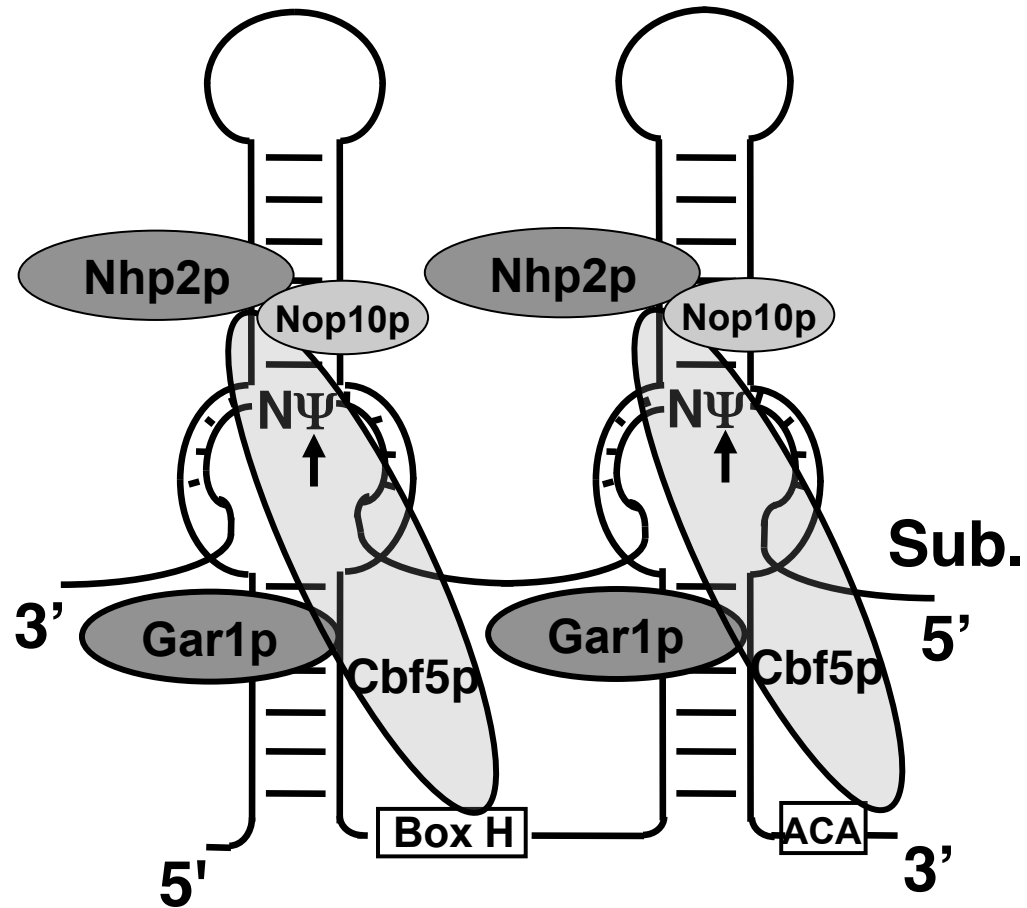

Sup. Fig. 2) Schematic of an H/ACA RNP, consisting of a box H/ACA RNA and four core proteins, namely Cbf5p, Gar1p, Nhp2p, and Nop10p. A substrate RNA (Sub.) and the target nucleotide ( $\Psi$ ) are also shown (adopted and modified from<sup>28</sup>).

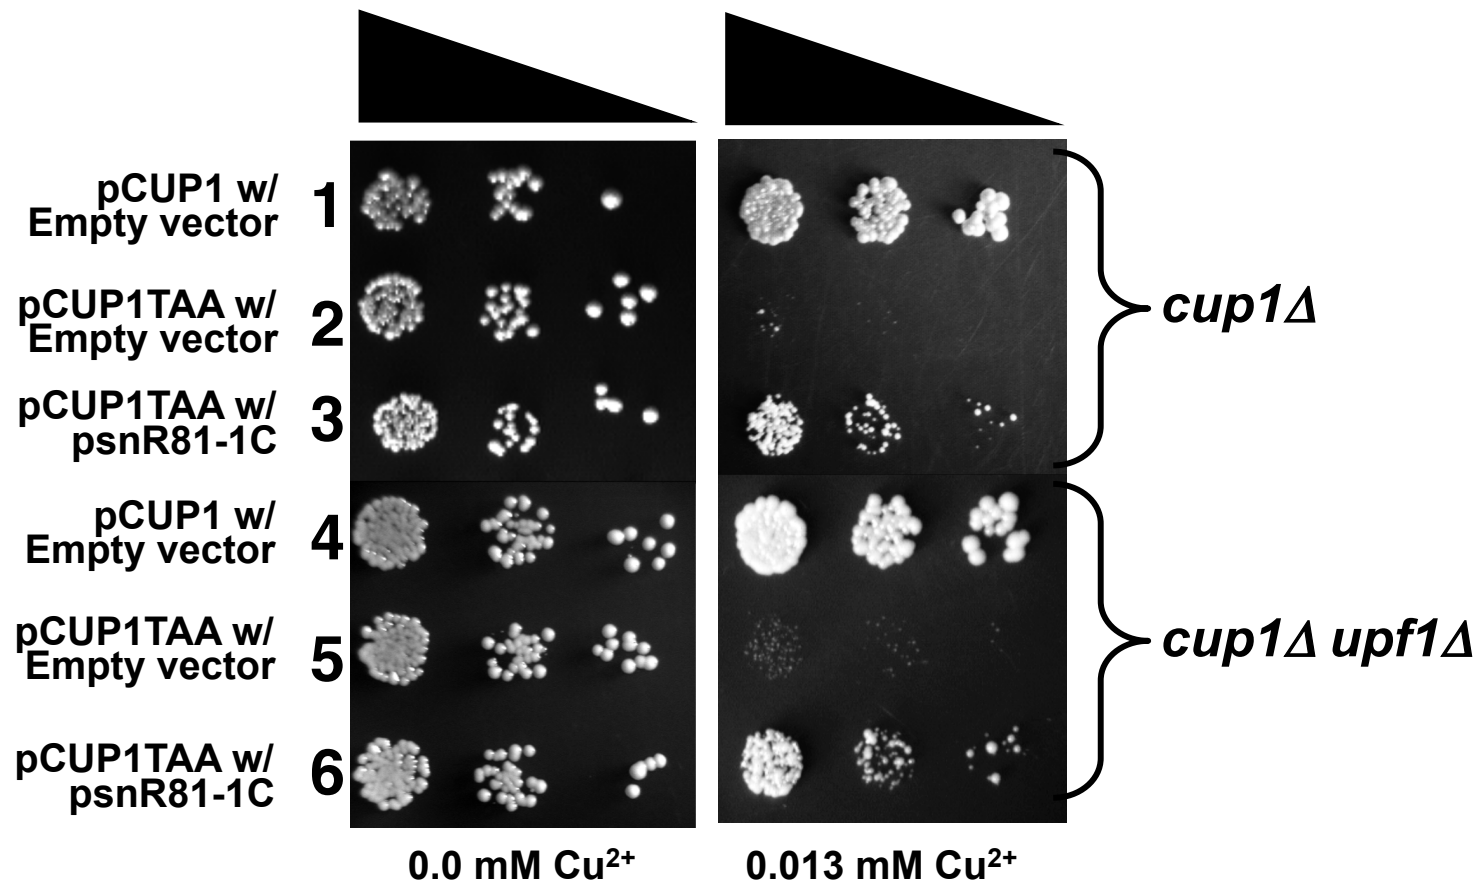

Sup. Fig 3. Deletion of UPF1 results in a minor nonsense suppression phenotype. pCUP1 or pcup1-PTC along with either an empty vector or psnR81-1C were transformed into either a *cup1Δ* or *cup1Δ upf1Δ* strain. Cell growth was assessed on solid synthetic medium (-URA - LEU) containing either 0.0 mM or 0.013 mM  $\text{CuSO}_4$ , as indicated.

## Peptide

LSSGCAFIDVSR

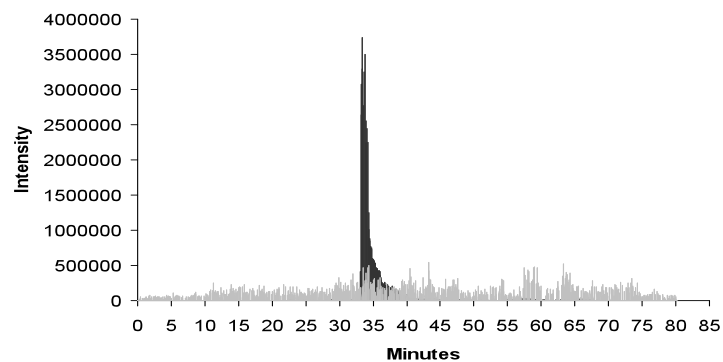

LSSGCASIDVSR

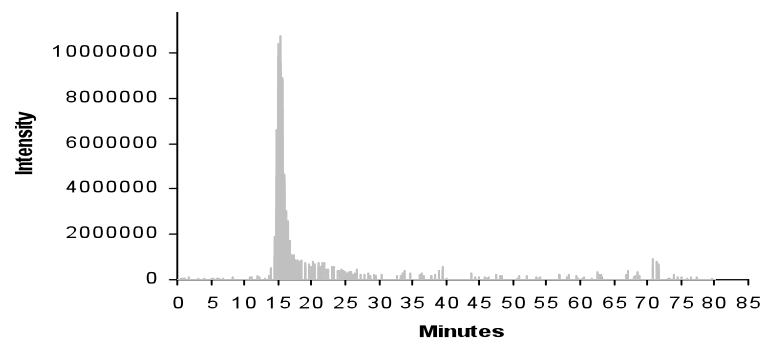

LSSGCATIDVSR

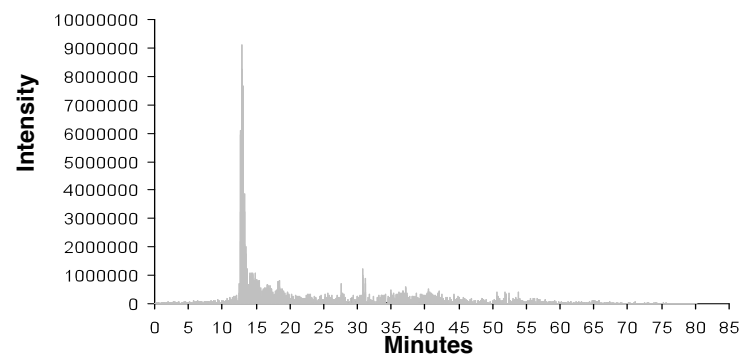

— Trm4p WT

— Trm4p F602TAA with  
specific guide RNA

Sup. Fig. 4.  $\Psi$ AA directs the incorporation of serine and threonine. HPLC traces showing the elution of the novel serine- and threonine-containing peptides in the indicated samples. The underlined amino acid represents the site of the termination codon.

# Sup Fig 5a

Trm4p F602TAA  
w/ Specific Guide

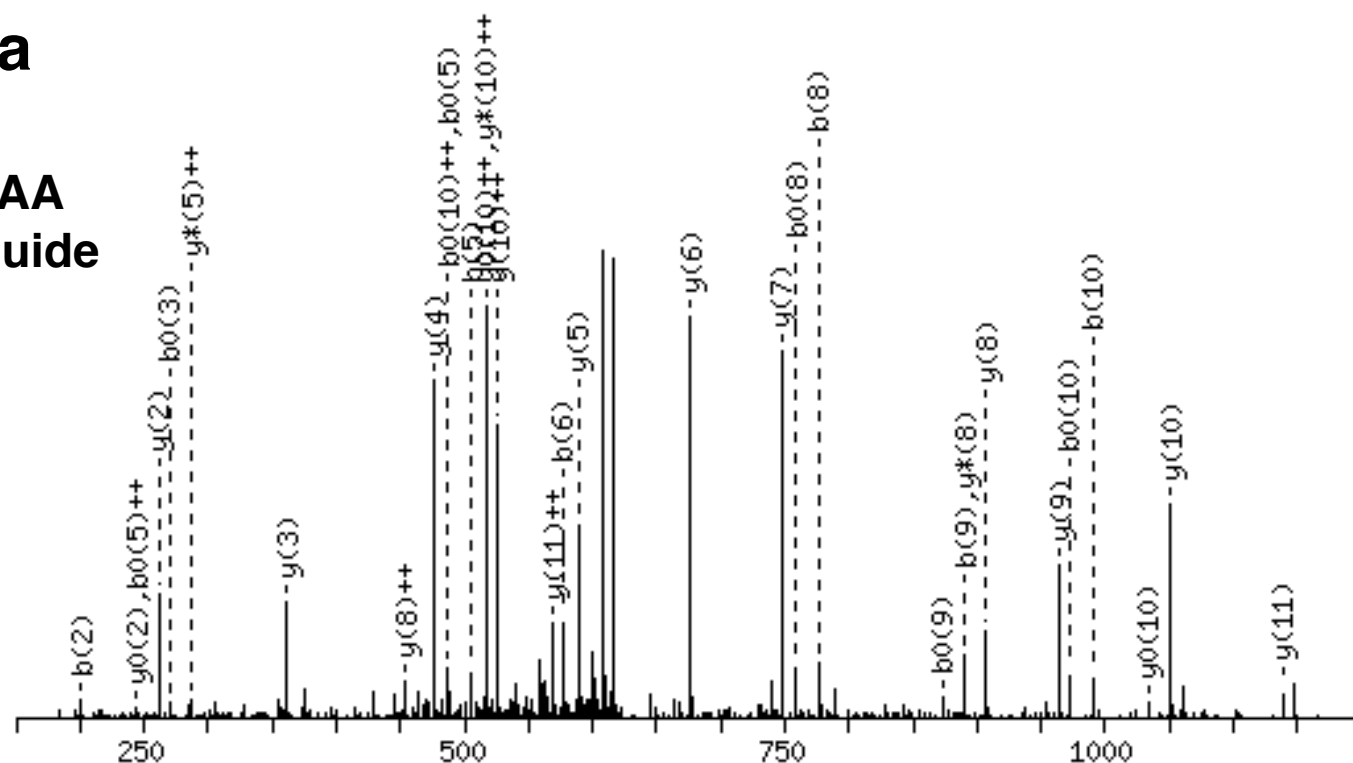

| #  | b               | b <sup>++</sup> | b <sup>0</sup>  | b <sup>0++</sup> | Seq. | y                | y <sup>++</sup> | y <sup>*</sup>  | y <sup>*++</sup> | y <sup>0</sup>   | y <sup>0++</sup> | #  |
|----|-----------------|-----------------|-----------------|------------------|------|------------------|-----------------|-----------------|------------------|------------------|------------------|----|
| 1  | 114.0913        | 57.5493         |                 |                  | L    |                  |                 |                 |                  |                  |                  | 12 |
| 2  | <b>201.1234</b> | 101.0653        | 183.1128        | 92.0600          | S    | <b>1138.5157</b> | <b>569.7615</b> | 1121.4892       | 561.2482         | 1120.5051        | 560.7562         | 11 |
| 3  | 288.1554        | 144.5813        | <b>270.1448</b> | 135.5761         | S    | <b>1051.4837</b> | <b>526.2455</b> | 1034.4571       | <b>517.7322</b>  | <b>1033.4731</b> | <b>517.2402</b>  | 10 |
| 4  | 345.1769        | 173.0921        | 327.1663        | 164.0868         | G    | <b>964.4517</b>  | 482.7295        | 947.4251        | 474.2162         | 946.4411         | 473.7242         | 9  |
| 5  | <b>505.2075</b> | 253.1074        | <b>487.1969</b> | <b>244.1021</b>  | C    | <b>907.4302</b>  | <b>454.2187</b> | <b>890.4036</b> | 445.7055         | 889.4196         | 445.2135         | 8  |
| 6  | <b>576.2446</b> | 288.6259        | 558.2341        | 279.6207         | A    | <b>747.3995</b>  | 374.2034        | 730.3730        | 365.6901         | 729.3890         | 365.1981         | 7  |
| 7  | 663.2767        | 332.1420        | 645.2661        | 323.1367         | S    | <b>676.3624</b>  | 338.6849        | 659.3359        | 330.1716         | 658.3519         | 329.6796         | 6  |
| 8  | <b>776.3607</b> | 388.6840        | <b>758.3501</b> | 379.6787         | I    | <b>589.3304</b>  | 295.1688        | 572.3039        | <b>286.6556</b>  | 571.3198         | 286.1636         | 5  |
| 9  | <b>891.3877</b> | 446.1975        | <b>873.3771</b> | 437.1922         | D    | <b>476.2463</b>  | 238.6268        | 459.2198        | 230.1135         | 458.2358         | 229.6215         | 4  |
| 10 | <b>990.4561</b> | 495.7317        | <b>972.4455</b> | <b>486.7264</b>  | V    | <b>361.2194</b>  | 181.1133        | 344.1928        | 172.6001         | 343.2088         | 172.1081         | 3  |
| 11 | 1077.4881       | 539.2477        | 1059.4775       | 530.2424         | S    | <b>262.1510</b>  | 131.5791        | 245.1244        | 123.0659         | <b>244.1404</b>  | 122.5738         | 2  |
| 12 |                 |                 |                 |                  | R    | 175.1190         | 88.0631         | 158.0924        | 79.5498          |                  |                  | 1  |

# Sup Fig 5b

Trm4p F602TAA  
w/ Specific Guide

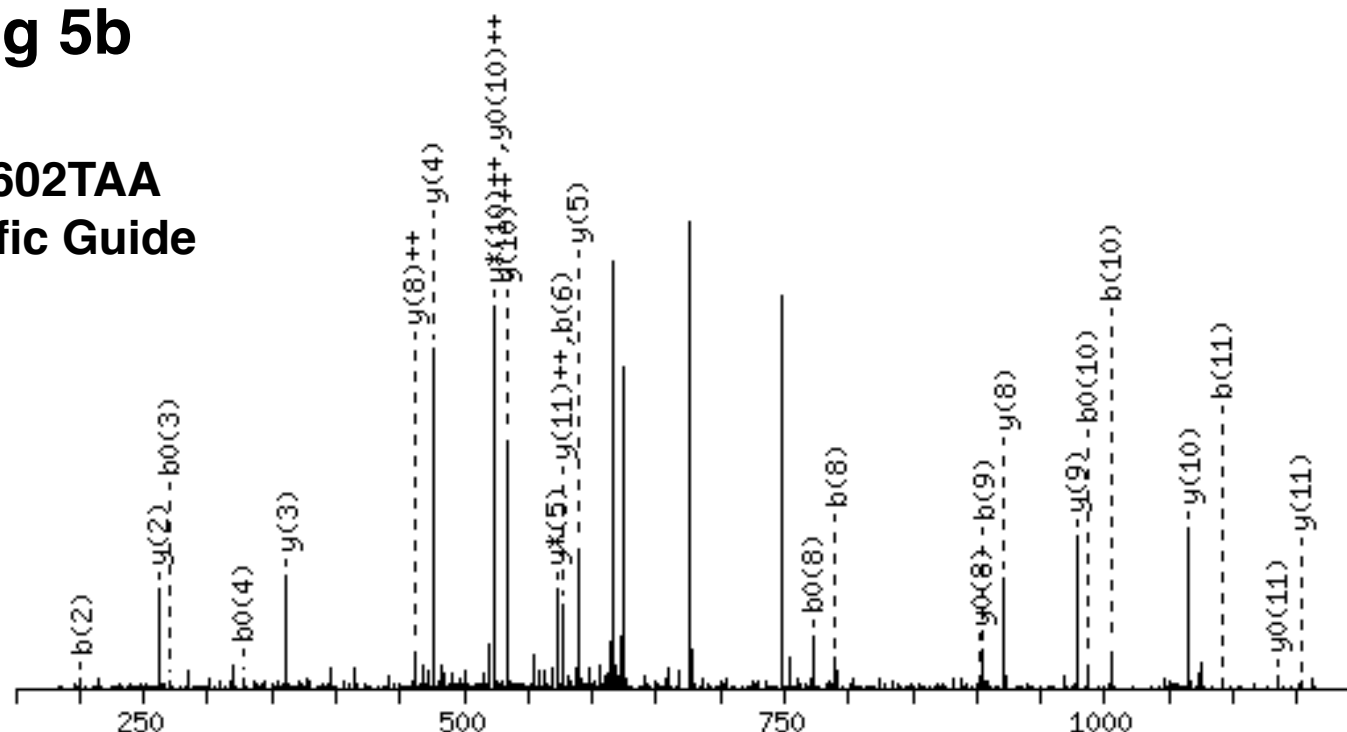

| #  | b                | b <sup>++</sup> | b <sup>0</sup>  | b <sup>0++</sup> | Seq. | y                | y <sup>++</sup> | y <sup>*</sup>  | y <sup>++*</sup> | y <sup>0</sup>   | y <sup>0++</sup> | #  |
|----|------------------|-----------------|-----------------|------------------|------|------------------|-----------------|-----------------|------------------|------------------|------------------|----|
| 1  | 114.0913         | 57.5493         |                 |                  | L    |                  |                 |                 |                  |                  |                  | 12 |
| 2  | <b>201.1234</b>  | 101.0653        | 183.1128        | 92.0600          | S    | <b>1152.5314</b> | <b>576.7693</b> | 1135.5048       | 568.2560         | <b>1134.5208</b> | 567.7640         | 11 |
| 3  | 288.1554         | 144.5813        | <b>270.1448</b> | 135.5761         | S    | <b>1065.4993</b> | <b>533.2533</b> | 1048.4728       | <b>524.7400</b>  | 1047.4888        | <b>524.2480</b>  | 10 |
| 4  | 345.1769         | 173.0921        | <b>327.1663</b> | 164.0868         | G    | <b>978.4673</b>  | 489.7373        | 961.4408        | 481.2240         | 960.4567         | 480.7320         | 9  |
| 5  | 505.2075         | 253.1074        | 487.1969        | 244.1021         | C    | <b>921.4458</b>  | <b>461.2266</b> | 904.4193        | 452.7133         | <b>903.4353</b>  | 452.2213         | 8  |
| 6  | <b>576.2446</b>  | 288.6259        | 558.2341        | 279.6207         | A    | 761.4152         | 381.2112        | 744.3886        | 372.6980         | 743.4046         | 372.2060         | 7  |
| 7  | 677.2923         | 339.1498        | 659.2817        | 330.1445         | T    | 690.3781         | 345.6927        | 673.3515        | 337.1794         | 672.3675         | 336.6874         | 6  |
| 8  | <b>790.3764</b>  | 395.6918        | <b>772.3658</b> | 386.6865         | I    | <b>589.3304</b>  | 295.1688        | <b>572.3039</b> | 286.6556         | 571.3198         | 286.1636         | 5  |
| 9  | <b>905.4033</b>  | 453.2053        | 887.3927        | 444.2000         | D    | <b>476.2463</b>  | 238.6268        | 459.2198        | 230.1135         | 458.2358         | 229.6215         | 4  |
| 10 | <b>1004.4717</b> | 502.7395        | <b>986.4612</b> | 493.7342         | V    | <b>361.2194</b>  | 181.1133        | 344.1928        | 172.6001         | 343.2088         | 172.1081         | 3  |
| 11 | <b>1091.5038</b> | 546.2555        | 1073.4932       | 537.2502         | S    | <b>262.1510</b>  | 131.5791        | 245.1244        | 123.0659         | 244.1404         | 122.5738         | 2  |
| 12 |                  |                 |                 |                  | R    | 175.1190         | 88.0631         | 158.0924        | 79.5498          |                  |                  | 1  |

Sup. Fig 5. Identification of amino acids encoded at pseudouridylated UAA ( $\Psi$ AA). (a) MS/MS spectrum (top) and mass of all possible ions associated with the serine-containing peptide (bottom). Bold masses represent ions identified. (b) MS/MS spectrum (top) and mass of all possible ions associated with the threonine-containing peptide (bottom). Bold masses represent ions identified.

# Sup Fig 6a

Trm4p F602TAG  
w/ Specific Guide

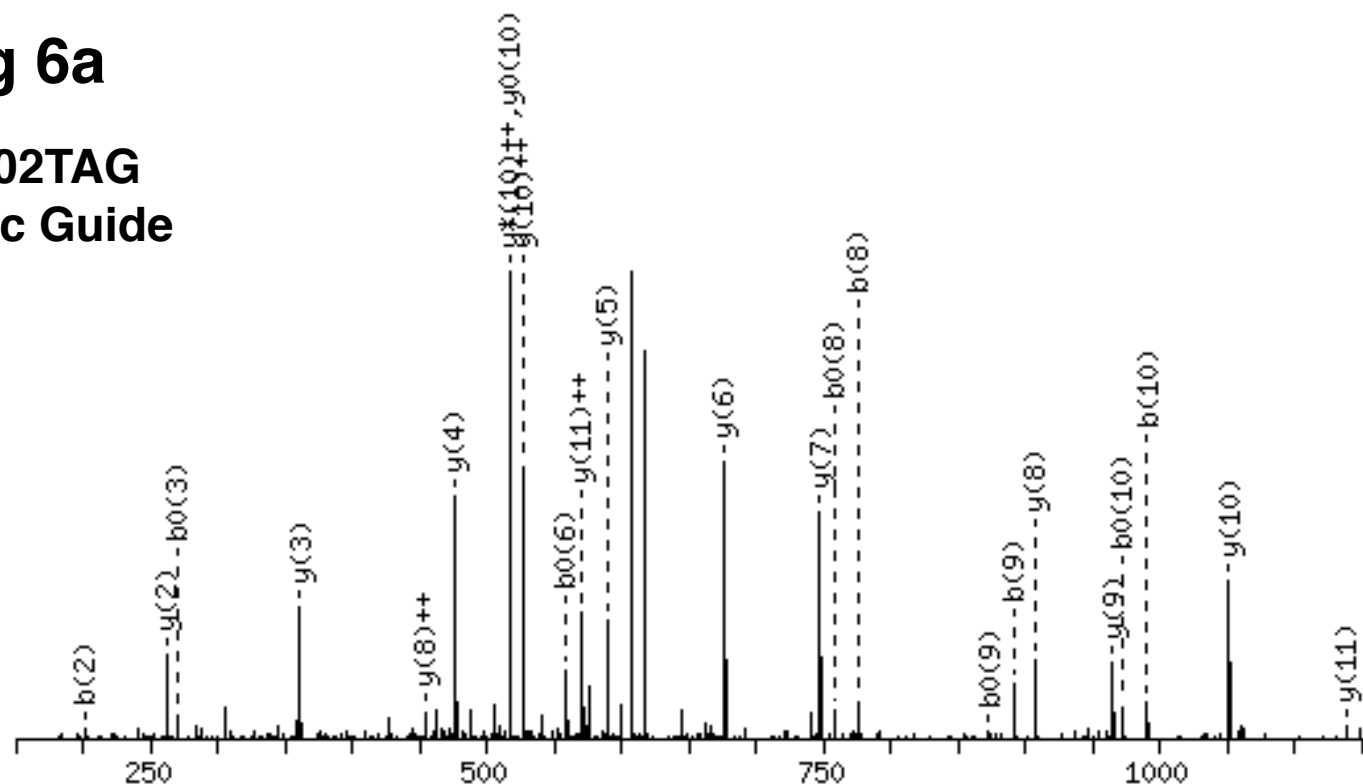

| #  | b               | b <sup>++</sup> | b <sup>0</sup>  | b <sup>0++</sup> | Seq. | y                | y <sup>++</sup> | y <sup>*</sup> | y <sup>*++</sup> | y <sup>0</sup> | y <sup>0++</sup> | #  |
|----|-----------------|-----------------|-----------------|------------------|------|------------------|-----------------|----------------|------------------|----------------|------------------|----|
| 1  | 114.0913        | 57.5493         |                 |                  | L    |                  |                 |                |                  |                |                  | 12 |
| 2  | <b>201.1234</b> | 101.0653        | 183.1128        | 92.0600          | S    | <b>1138.5157</b> | <b>569.7615</b> | 1121.4892      | 561.2482         | 1120.5051      | 560.7562         | 11 |
| 3  | 288.1554        | 144.5813        | <b>270.1448</b> | 135.5761         | S    | <b>1051.4837</b> | <b>526.2455</b> | 1034.4571      | <b>517.7322</b>  | 1033.4731      | <b>517.2402</b>  | 10 |
| 4  | 345.1769        | 173.0921        | 327.1663        | 164.0868         | G    | <b>964.4517</b>  | 482.7295        | 947.4251       | 474.2162         | 946.4411       | 473.7242         | 9  |
| 5  | 505.2075        | 253.1074        | 487.1969        | 244.1021         | C    | <b>907.4302</b>  | <b>454.2187</b> | 890.4036       | 445.7055         | 889.4196       | 445.2135         | 8  |
| 6  | 576.2446        | 288.6259        | <b>558.2341</b> | 279.6207         | A    | <b>747.3995</b>  | 374.2034        | 730.3730       | 365.6901         | 729.3890       | 365.1981         | 7  |
| 7  | 663.2767        | 332.1420        | 645.2661        | 323.1367         | S    | <b>676.3624</b>  | 338.6849        | 659.3359       | 330.1716         | 658.3519       | 329.6796         | 6  |
| 8  | <b>776.3607</b> | 388.6840        | <b>758.3501</b> | 379.6787         | I    | <b>589.3304</b>  | 295.1688        | 572.3039       | 286.6556         | 571.3198       | 286.1636         | 5  |
| 9  | <b>891.3877</b> | 446.1975        | <b>873.3771</b> | 437.1922         | D    | <b>476.2463</b>  | 238.6268        | 459.2198       | 230.1135         | 458.2358       | 229.6215         | 4  |
| 10 | <b>990.4561</b> | 495.7317        | <b>972.4455</b> | 486.7264         | V    | <b>361.2194</b>  | 181.1133        | 344.1928       | 172.6001         | 343.2088       | 172.1081         | 3  |
| 11 | 1077.4881       | 539.2477        | 1059.4775       | 530.2424         | S    | <b>262.1510</b>  | 131.5791        | 245.1244       | 123.0659         | 244.1404       | 122.5738         | 2  |
| 12 |                 |                 |                 |                  | R    | 175.1190         | 88.0631         | 158.0924       | 79.5498          |                |                  | 1  |

# Sup Fig 6b

Trm4p F602TAG  
w/ Specific Guide

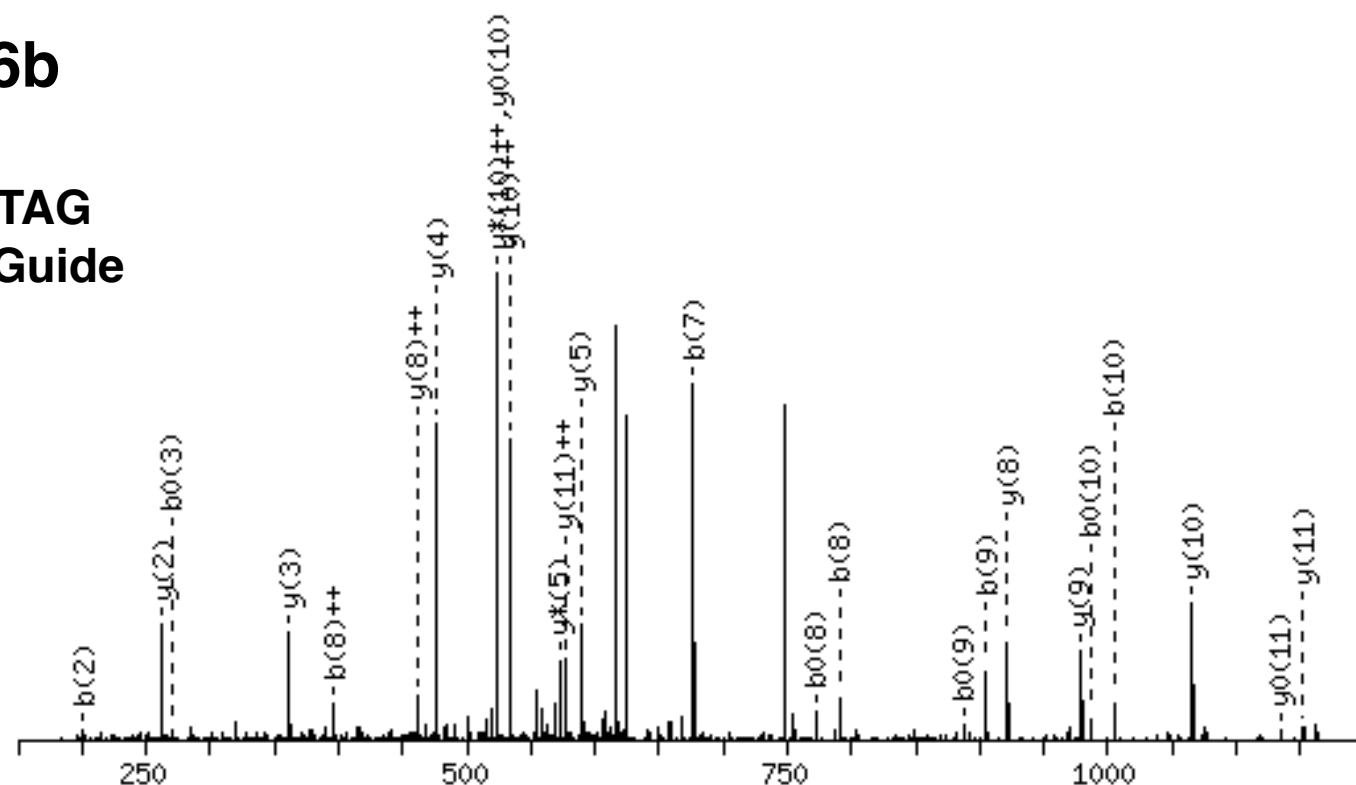

| #  | b                | b <sup>++</sup> | b <sup>0</sup>  | b <sup>0++</sup> | Seq. | y                | y <sup>++</sup> | y <sup>*</sup>  | y <sup>++</sup> | y <sup>0</sup>   | y <sup>0++</sup> | #  |
|----|------------------|-----------------|-----------------|------------------|------|------------------|-----------------|-----------------|-----------------|------------------|------------------|----|
| 1  | 114.0913         | 57.5493         |                 |                  | L    |                  |                 |                 |                 |                  |                  | 12 |
| 2  | <b>201.1234</b>  | 101.0653        | 183.1128        | 92.0600          | S    | <b>1152.5314</b> | <b>576.7693</b> | 1135.5048       | 568.2560        | <b>1134.5208</b> | 567.7640         | 11 |
| 3  | 288.1554         | 144.5813        | <b>270.1448</b> | 135.5761         | S    | <b>1065.4993</b> | <b>533.2533</b> | 1048.4728       | <b>524.7400</b> | 1047.4888        | <b>524.2480</b>  | 10 |
| 4  | 345.1769         | 173.0921        | 327.1663        | 164.0868         | G    | <b>978.4673</b>  | 489.7373        | 961.4408        | 481.2240        | 960.4567         | 480.7320         | 9  |
| 5  | 505.2075         | 253.1074        | 487.1969        | 244.1021         | C    | <b>921.4458</b>  | <b>461.2266</b> | 904.4193        | 452.7133        | 903.4353         | 452.2213         | 8  |
| 6  | 576.2446         | 288.6259        | 558.2341        | 279.6207         | A    | 761.4152         | 381.2112        | 744.3886        | 372.6980        | 743.4046         | 372.2060         | 7  |
| 7  | <b>677.2923</b>  | 339.1498        | 659.2817        | 330.1445         | T    | 690.3781         | 345.6927        | 673.3515        | 337.1794        | 672.3675         | 336.6874         | 6  |
| 8  | <b>790.3764</b>  | <b>395.6918</b> | <b>772.3658</b> | 386.6865         | I    | <b>589.3304</b>  | 295.1688        | <b>572.3039</b> | 286.6556        | 571.3198         | 286.1636         | 5  |
| 9  | <b>905.4033</b>  | 453.2053        | <b>887.3927</b> | 444.2000         | D    | <b>476.2463</b>  | 238.6268        | 459.2198        | 230.1135        | 458.2358         | 229.6215         | 4  |
| 10 | <b>1004.4717</b> | 502.7395        | <b>986.4612</b> | 493.7342         | V    | <b>361.2194</b>  | 181.1133        | 344.1928        | 172.6001        | 343.2088         | 172.1081         | 3  |
| 11 | 1091.5038        | 546.2555        | 1073.4932       | 537.2502         | S    | <b>262.1510</b>  | 131.5791        | 245.1244        | 123.0659        | 244.1404         | 122.5738         | 2  |
| 12 |                  |                 |                 |                  | R    | 175.1190         | 88.0631         | 158.0924        | 79.5498         |                  |                  | 1  |

Sup. Fig. 6. Identification of amino acids encoded at pseudouridylated UAG ( $\Psi$ AG). (a) MS/MS spectrum (top) and mass of all possible ions associated with the serine-containing peptide (bottom). Bold masses represent ions identified. (b) MS/MS spectrum (top) and mass of all possible ions associated with the threonine-containing peptide (bottom). Bold masses represent ions identified.

# Sup Fig 7a

Trm4p F602TGA  
w/ Specific Guide

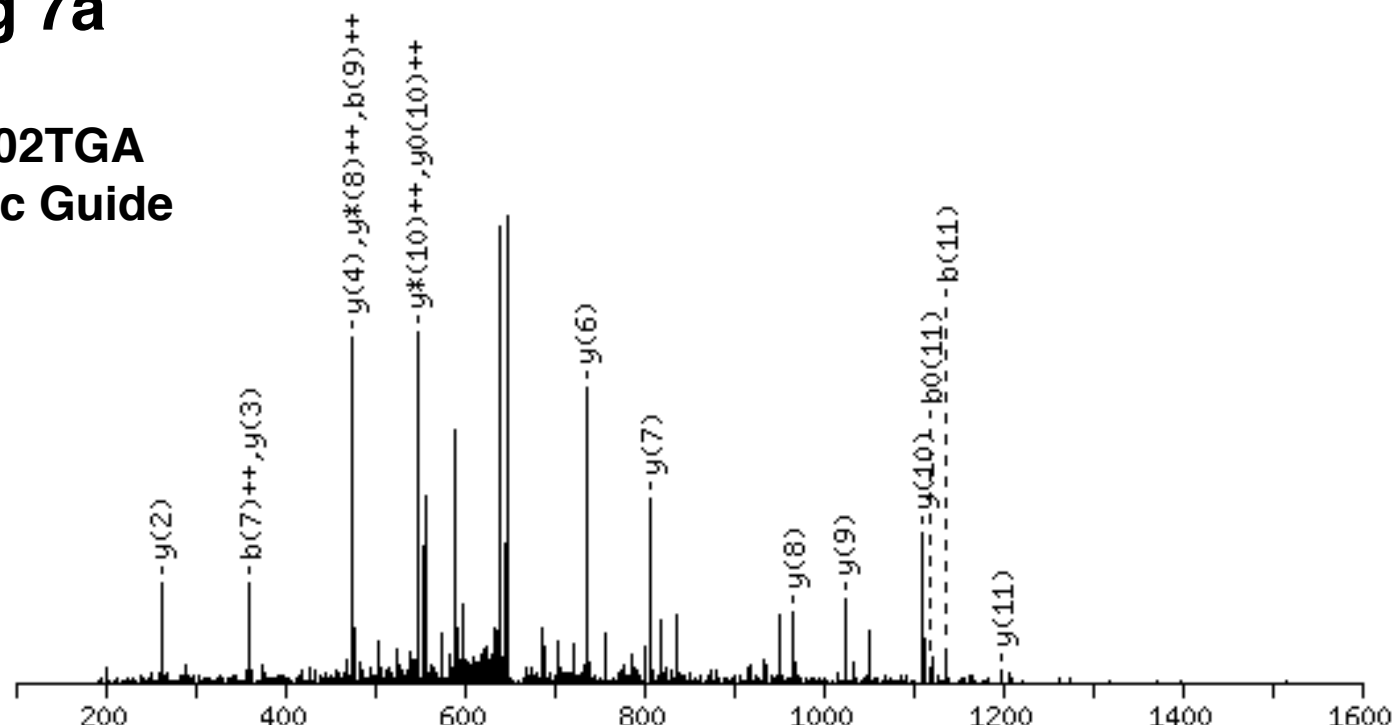

| #  | b         | b <sup>++</sup> | b <sup>0</sup> | b <sup>0++</sup> | Seq. | y         | y <sup>++</sup> | y <sup>*</sup> | y <sup>*++</sup> | y <sup>0</sup> | y <sup>0++</sup> | #  |
|----|-----------|-----------------|----------------|------------------|------|-----------|-----------------|----------------|------------------|----------------|------------------|----|
| 1  | 114.0913  | 57.5493         |                |                  | L    |           |                 |                |                  |                |                  | 12 |
| 2  | 201.1234  | 101.0653        | 183.1128       | 92.0600          | S    | 1198.5521 | 599.7797        | 1181.5255      | 591.2664         | 1180.5415      | 590.7744         | 11 |
| 3  | 288.1554  | 144.5813        | 270.1448       | 135.5761         | S    | 1111.5201 | 556.2637        | 1094.4935      | 547.7504         | 1093.5095      | 547.2584         | 10 |
| 4  | 345.1769  | 173.0921        | 327.1663       | 164.0868         | G    | 1024.4880 | 512.7477        | 1007.4615      | 504.2344         | 1006.4775      | 503.7424         | 9  |
| 5  | 505.2075  | 253.1074        | 487.1969       | 244.1021         | C    | 967.4666  | 484.2369        | 950.4400       | 475.7237         | 949.4560       | 475.2316         | 8  |
| 6  | 576.2446  | 288.6259        | 558.2341       | 279.6207         | A    | 807.4359  | 404.2216        | 790.4094       | 395.7083         | 789.4254       | 395.2163         | 7  |
| 7  | 723.3130  | 362.1602        | 705.3025       | 353.1549         | F    | 736.3988  | 368.7030        | 719.3723       | 360.1898         | 718.3883       | 359.6978         | 6  |
| 8  | 836.3971  | 418.7022        | 818.3865       | 409.6969         | I    | 589.3304  | 295.1688        | 572.3039       | 286.6556         | 571.3198       | 286.1636         | 5  |
| 9  | 951.4240  | 476.2157        | 933.4135       | 467.2104         | D    | 476.2463  | 238.6268        | 459.2198       | 230.1135         | 458.2358       | 229.6215         | 4  |
| 10 | 1050.4925 | 525.7499        | 1032.4819      | 516.7446         | V    | 361.2194  | 181.1133        | 344.1928       | 172.6001         | 343.2088       | 172.1081         | 3  |
| 11 | 1137.5245 | 569.2659        | 1119.5139      | 560.2606         | S    | 262.1510  | 131.5791        | 245.1244       | 123.0659         | 244.1404       | 122.5738         | 2  |
| 12 |           |                 |                |                  | R    | 175.1190  | 88.0631         | 158.0924       | 79.5498          |                |                  | 1  |

# Sup Fig 7b

## Trm4p F602TGA w/ Specific Guide

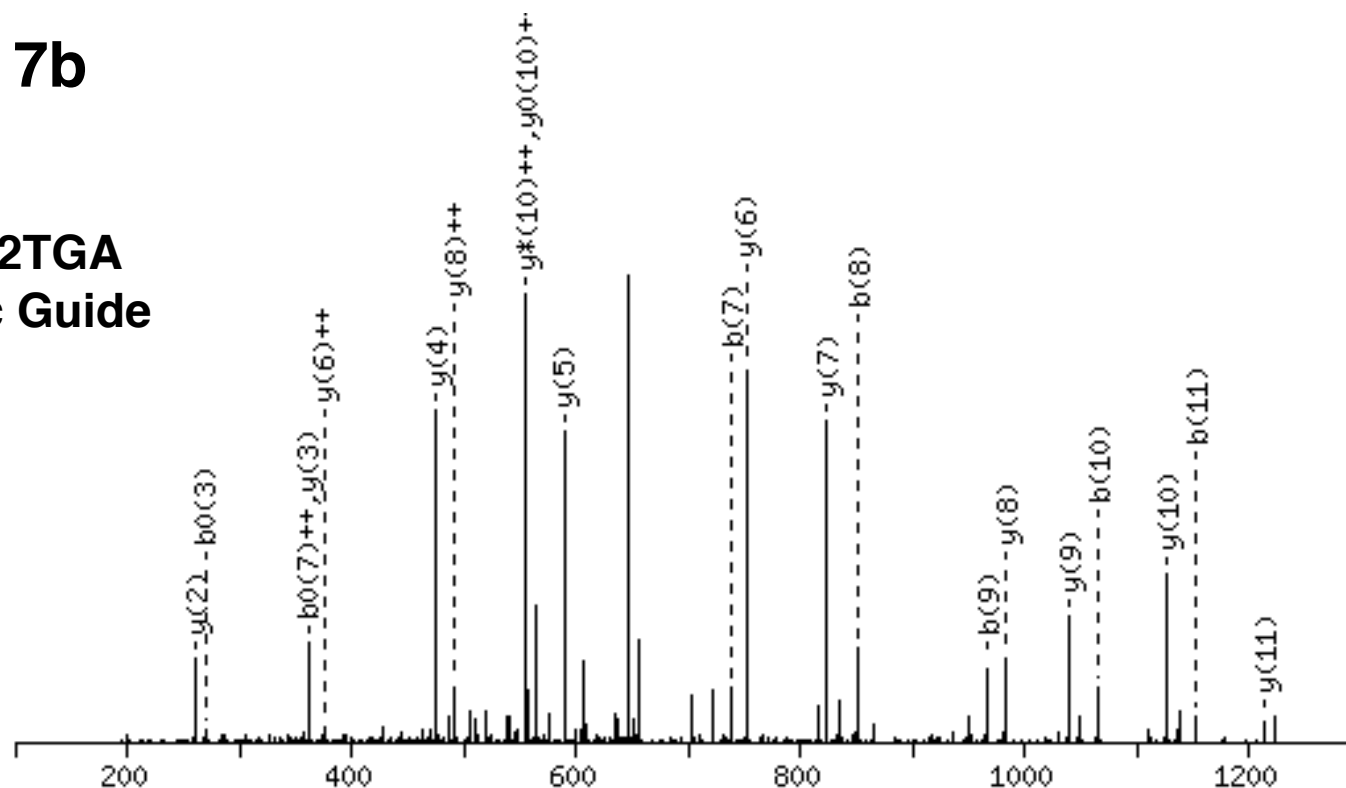

| #  | b                | b <sup>++</sup> | b <sup>0</sup>  | b <sup>0++</sup> | Seq. | y               | y <sup>++</sup> | y <sup>*</sup> | y <sup>*++</sup> | y <sup>0</sup> | y <sup>0++</sup> | #  |
|----|------------------|-----------------|-----------------|------------------|------|-----------------|-----------------|----------------|------------------|----------------|------------------|----|
| 1  | 114.0913         | 57.5493         |                 |                  | L    |                 |                 |                |                  |                |                  | 12 |
| 2  | 201.1234         | 101.0653        | 183.1128        | 92.0600          | S    | 1214.5470       | 607.7771        | 1197.5205      | 599.2639         | 1196.5364      | 598.7719         | 11 |
| 3  | 288.1554         | 144.5813        | <b>270.1448</b> | 135.5761         | S    | 1127.5150       | 564.2611        | 1110.4884      | <b>555.7479</b>  | 1109.5044      | <b>555.2558</b>  | 10 |
| 4  | 345.1769         | 173.0921        | 327.1663        | 164.0868         | G    | 1040.4830       | 520.7451        | 1023.4564      | 512.2318         | 1022.4724      | 511.7398         | 9  |
| 5  | 505.2075         | 253.1074        | 487.1969        | 244.1021         | C    | <b>983.4615</b> | <b>492.2344</b> | 966.4349       | 483.7211         | 965.4509       | 483.2291         | 8  |
| 6  | 576.2446         | 288.6259        | 558.2341        | 279.6207         | A    | <b>823.4308</b> | 412.2191        | 806.4043       | 403.7058         | 805.4203       | 403.2138         | 7  |
| 7  | <b>739.3080</b>  | 370.1576        | 721.2974        | <b>361.1523</b>  | Y    | <b>752.3937</b> | <b>376.7005</b> | 735.3672       | 368.1872         | 734.3832       | 367.6952         | 6  |
| 8  | <b>852.3920</b>  | 426.6996        | 834.3815        | 417.6944         | I    | <b>589.3304</b> | 295.1688        | 572.3039       | 286.6556         | 571.3198       | 286.1636         | 5  |
| 9  | <b>967.4190</b>  | 484.2131        | 949.4084        | 475.2078         | D    | <b>476.2463</b> | 238.6268        | 459.2198       | 230.1135         | 458.2358       | 229.6215         | 4  |
| 10 | <b>1066.4874</b> | 533.7473        | 1048.4768       | 524.7420         | V    | <b>361.2194</b> | 181.1133        | 344.1928       | 172.6001         | 343.2088       | 172.1081         | 3  |
| 11 | <b>1153.5194</b> | 577.2633        | 1135.5088       | 568.2581         | S    | <b>262.1510</b> | 131.5791        | 245.1244       | 123.0659         | 244.1404       | 122.5738         | 2  |
| 12 |                  |                 |                 |                  | R    | 175.1190        | 88.0631         | 158.0924       | 79.5498          |                |                  | 1  |

Sup. Fig. 7. Identification of amino acids encoded at pseudouridylated UGA ( $\Psi$ GA). (a) MS/MS spectrum (top) and mass of all possible ions associated with the phenylalanine-containing peptide (bottom). (b) MS/MS spectrum (top) and mass of all possible ions associated with the tyrosine-containing peptide (bottom). Bold masses represent ions identified.

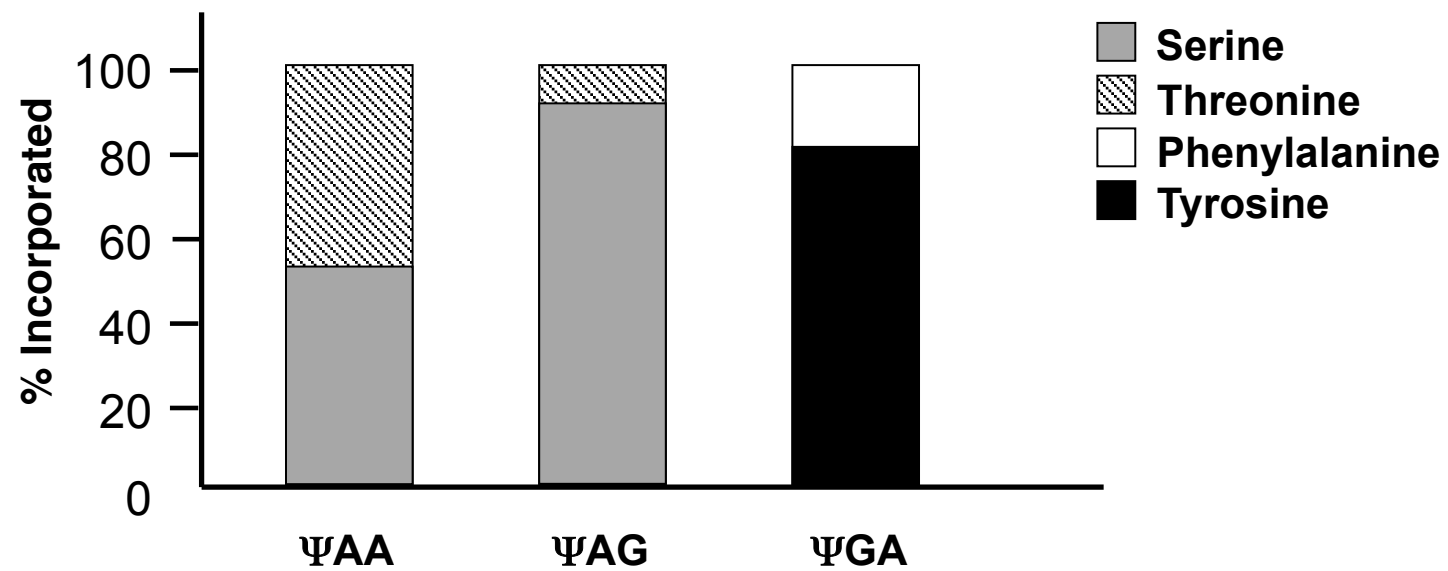

Sup. Fig. 8. Quantification of the amino acids incorporated at pseudouridylated nonsense codons.

| <b>Nonsense Codon</b> | <b>Amino Acid</b> | <b>tRNA Anticodons</b> |            |            |            |
|-----------------------|-------------------|------------------------|------------|------------|------------|
| <b>ΨAA and ΨAG</b>    | <b>Ser</b>        | <b>AGA</b>             | <b>CGA</b> | <b>TGA</b> | <b>GCT</b> |
|                       | <b>Thr</b>        | <b>AGT</b>             | <b>CGT</b> | <b>TGT</b> |            |
| <b>ΨGA</b>            | <b>Tyr</b>        | <b>GTA</b>             |            |            |            |
|                       | <b>Phe</b>        | <b>GAA</b>             |            |            |            |

Sup. Fig. 9. Schematic depiction of the tRNA anticodon sequences responsible for incorporating amino acids at pseudouridylated nonsense codons.

| <b>H/ACA RNA</b>            | <b>Target ORF</b> | <b>Function of ORF</b>                          |
|-----------------------------|-------------------|-------------------------------------------------|
| <b>Known Guide Regions</b>  |                   |                                                 |
| <b>snR003</b>               | <b>YKL050C</b>    | <b>Unknown</b>                                  |
| <b>snR031</b>               | <b>YHR156C</b>    | <b>U5 snRNP component</b>                       |
| <b>snR044</b>               | <b>YPL060W</b>    | <b>Mitochondria Mg<sup>2+</sup> transporter</b> |
| <b>snR049</b>               | <b>YJL060W</b>    | <b>Kynurenine aminotransferase</b>              |
| <b>snR080</b>               | <b>YPL227C</b>    | <b>Glucosyltransferase</b>                      |
| <b>snR081</b>               | <b>YNL232W</b>    | <b>RNA Exosome</b>                              |
| <b>Orphan Guide Regions</b> |                   |                                                 |
| <b>snR009</b>               | <b>YMR006C</b>    | <b>Phospholipase B</b>                          |
| <b>snR011</b>               | <b>YDL111C</b>    | <b>RNA Exosome</b>                              |
| <b>snR030</b>               | <b>YLR035C</b>    | <b>DNA repair</b>                               |
|                             | <b>YAL047C</b>    | <b>Microtubule nucleation</b>                   |
|                             | <b>YDR175C</b>    | <b>Mitochondrial ribosomal protein</b>          |

Sup Fig. 10. Computationally predicted endogenous nonsense codons that are targets of the H/ACA RNP machinery.
